# Supplementary material
Source: MDPI journal article supplement (https://www.mdpi.com/2073-445X/12/10/1911)
Supplement: s1 [file s1]

## Supplementary Materials

Table S1. Landowner demographics and their willingness to plant agroforestry with conservation program funding

| Design                | Independent Factor <sup>1</sup> | P-Value   | Model Fit   | Variable Type <sup>2</sup> | Relationship <sup>3</sup> |
|-----------------------|---------------------------------|-----------|-------------|----------------------------|---------------------------|
| Multi Windbreak       | Age                             | 0.0004**  | r2 = 0.0663 | Categorical                | Negative                  |
|                       | Gender                          | 0.6107    |             | Categorical                |                           |
|                       | Primary Farmer                  | 0.8951    |             | Categorical                |                           |
|                       | Conservation Program Interest   | <0.0001** | r2 = 0.1291 | Categorical                | Positive                  |
|                       | Farm Income                     | 0.1656    |             | Categorical                |                           |
|                       | Marginal Land                   | 0.0506*   | r2 = 0.0223 | Categorical                | Positive                  |
|                       | Acres                           | 0.2042    |             | Continuous                 |                           |
|                       | Beginning Farmer                | 0.6768    |             | Categorical                |                           |
| Multi Riparian Buffer | Age                             | 0.0451*   | r2 = 0.0267 | Categorical                | Negative                  |
|                       | Gender                          | 0.5035    |             | Categorical                |                           |
|                       | Primary Farmer                  | 0.4023    |             | Categorical                |                           |
|                       | Conservation Program Interest   | <.0001**  | r2 = 0.1141 | Categorical                | Positive                  |
|                       | Farm Income                     | 0.9153    |             | Categorical                |                           |
|                       | Marginal Land                   | 0.0453*   | r2 = 0.0232 | Categorical                | Positive                  |
|                       | Acres                           | 0.6419    |             | Continuous                 |                           |
|                       | Beginning Farmer                | 0.3466    |             | Categorical                |                           |
| Multi Silvopasture    | Age                             | 0.0803    |             | Categorical                |                           |
|                       | Gender                          | 0.9942    |             | Categorical                |                           |
|                       | Primary Farmer                  | 0.3321    |             | Categorical                |                           |
|                       | Conservation Program Interest   | <.0001**  | r2 = 0.0911 | Categorical                | Positive                  |
|                       | Farm Income                     | 0.7426    |             | Categorical                |                           |
|                       | Marginal Land                   | 0.5085    |             | Categorical                |                           |
|                       | Acres                           | 0.4103    |             | Continuous                 |                           |
|                       | Beginning Farmer                | 0.8574    |             | Categorical                |                           |
| Forest Farm           | Age                             | 0.0009**  | r2 = 0.0595 | Categorical                | Negative                  |
|                       | Gender                          | 0.6002    |             | Categorical                |                           |
|                       | Primary Farmer                  | 0.1491    |             | Categorical                |                           |
|                       | Conservation Program Interest   | <.0001**  | r2 = 0.2070 | Categorical                | Positive                  |
|                       | Farm Income                     | 0.5286    |             | Categorical                |                           |
|                       | Marginal Land                   | 0.1714    |             | Categorical                |                           |
|                       | Acres                           | 0.1041    |             | Continuous                 |                           |
|                       | Beginning Farmer                | 0.2084    |             | Categorical                |                           |

Results in table are from one-way ANOVA in SAS proc General Linear Model (GLM). Source: Landowner Survey, 2021

<sup>1</sup>Independent factors are demographic information of the farmer and his/her farm. Dependent factors include “would plant the agroforestry design,” “would plant the agroforestry design with conservation program funding,” and “would plant the design with technical assistance.” Age (<35, 35-66, 67+). Gender (Male, Female, Other). Primary Farmer (Yes/No). Conservation Program Interest (Yes/No). Farm Income (<\$1,000, \$1,000 - \$19,999, \$20,000 - \$39,999, \$40,000 - \$69,999, \$70,000 - \$99,000, \$100,000+). Marginal Land (Yes/Unsure/No). Acres owned. Beginning Farmer (Yes/No)

<sup>2</sup>Classification of independent factor used to predict willingness to plant agroforestry designs, either categorical or continuous

<sup>3</sup>Relationship between independent variable and its influence on dependent variable willingness to plant agroforestry design for significant variables

\* Indicates significant p-value. \*\* Indicates highly significant p-value. Model fit ( $r^2$ ) is shown for only significant variables

Table S2. Landowner demographics and their willingness to plant agroforestry with technical assistance

| Design                | Independent Factor <sup>1</sup> | P-Value   | Model Fit               | Variable Type <sup>2</sup> | Relationship <sup>3</sup> |
|-----------------------|---------------------------------|-----------|-------------------------|----------------------------|---------------------------|
| Multi Windbreak       | Age                             | 0.0091**  | r <sup>2</sup> = 0.0402 | Categorical                | Negative                  |
|                       | Gender                          | 0.4206    |                         | Categorical                |                           |
|                       | Primary Farmer                  | 0.6925    | r <sup>2</sup> = 0.1322 | Categorical                |                           |
|                       | Conservation Program Interest   | <.0001**  |                         | Categorical                | Positive                  |
|                       | Farm Income                     | 0.1298    | r <sup>2</sup> = 0.0249 | Categorical                |                           |
|                       | Marginal Land                   | 0.0354*   |                         | Categorical                | Positive                  |
|                       | Acres                           | 0.2271    |                         | Continuous                 |                           |
|                       | Beginning Farmer                | 0.6666    |                         | Categorical                |                           |
| Multi Riparian Buffer | Age                             | 0.0402*   | r <sup>2</sup> = 0.0278 | Categorical                | Negative                  |
|                       | Gender                          | 0.5332    |                         | Categorical                |                           |
|                       | Primary Farmer                  | 0.5273    | r <sup>2</sup> = 0.1010 | Categorical                |                           |
|                       | Conservation Program Interest   | <0.0001** |                         | Categorical                | Positive                  |
|                       | Farm Income                     | 0.8145    | r <sup>2</sup> = 0.0284 | Categorical                |                           |
|                       | Marginal Land                   | 0.0225*   |                         | Categorical                | Positive                  |
|                       | Acres                           | 0.776     |                         | Continuous                 |                           |
|                       | Beginning Farmer                | 0.4083    |                         | Categorical                |                           |
| Multi Silvopasture    | Age                             | 0.0304*   | r <sup>2</sup> = 0.0305 | Categorical                | Negative                  |
|                       | Gender                          | 0.9973    |                         | Categorical                |                           |
|                       | Primary Farmer                  | 0.1497    | r <sup>2</sup> = 0.0857 | Categorical                |                           |
|                       | Conservation Program Interest   | <0.0001** |                         | Categorical                | Positive                  |
|                       | Farm Income                     | 0.8292    |                         | Categorical                |                           |
|                       | Marginal Land                   | 0.2832    |                         | Categorical                |                           |
|                       | Acres                           | 0.2945    |                         | Continuous                 |                           |
|                       | Beginning Farmer                | 0.946     |                         | Categorical                |                           |
| Forest Farm           | Age                             | 0.0006**  | r <sup>2</sup> = 0.0628 | Categorical                | Negative                  |
|                       | Gender                          | 0.1861    |                         | Categorical                |                           |
|                       | Primary Farmer                  | 0.1099    | r <sup>2</sup> = 0.1807 | Categorical                |                           |
|                       | Conservation Program Interest   | <0.0001** |                         | Categorical                | Positive                  |
|                       | Farm Income                     | 0.6321    |                         | Categorical                |                           |
|                       | Marginal Land                   | 0.1577    |                         | Categorical                |                           |
|                       | Acres                           | 0.1054    |                         | Continuous                 |                           |
|                       | Beginning Farmer                | 0.3185    |                         | Categorical                |                           |

Results in table are from one-way ANOVA in SAS proc General Linear Model (GLM). Source: Landowner Survey, 2021

<sup>1</sup>Independent factors are demographic information of the farmer and his/her farm. Dependent factors include “would plant the agroforestry design,” “would plant the agroforestry design with conservation program funding,” and “would plant the design with technical assistance.” Age (<35, 35-66, 67+). Gender (Male, Female, Other). Primary Farmer (Yes/No). Conservation Program Interest (Yes/No). Farm Income (<\$1,000, \$1,000 - \$19,999, \$20,000 - \$39,999, \$40,000 - \$69,999, \$70,000 - \$99,000, \$100,000+). Marginal Land (Yes/Unsure/No). Acres owned. Beginning Farmer (Yes/No)

<sup>2</sup>Classification of independent factor used to predict willingness to plant agroforestry designs, either categorical or continuous

<sup>3</sup>Relationship between independent variable and its influence on dependent variable willingness to plant agroforestry design for significant variables

\* Indicates significant p-value

\*\* Indicates highly significant p-value. Model fit (r<sup>2</sup>) is shown for only significant variables

Table S3. Landowner farm goals and their willingness to plant agroforestry with conservation program funding

| Design                | Independent Factor <sup>1</sup> | P-value  | Model Fit   | Variable Type <sup>2</sup> | Relationship <sup>3</sup> |
|-----------------------|---------------------------------|----------|-------------|----------------------------|---------------------------|
| Multi Windbreak       | Goal of Income                  | 0.0248*  | r2 = 0.0278 | Categorical                | Neuatal                   |
|                       | Goal of Conservation            | 0.0026** | r2 = 0.0441 | Categorical                | Positive                  |
|                       | Goal of Recreation              | 0.0177*  | r2 = 0.0303 | Categorical                | Positive                  |
|                       | Goal of Education               | <.0001** | r2 = 0.0907 | Categorical                | Positive                  |
|                       | Goal of Agritourism             | <.0001** | r2 = 0.0978 | Categorical                | Positive                  |
|                       | Goal of Lifestyle               | 0.0833   |             | Categorical                |                           |
| Multi Riparian Buffer | Goal of Income                  | 0.3651   |             | Categorical                |                           |
|                       | Goal of Conservation            | 0.0637   |             | Categorical                |                           |
|                       | Goal of Recreation              | 0.0198*  | r2 = 0.0296 | Categorical                | Positive                  |
|                       | Goal of Education               | 0.0018** | r2 = 0.0471 | Categorical                | Positive                  |
|                       | Goal of Agritourism             | 0.0014** | r2 = 0.0491 | Categorical                | Positive                  |
|                       | Goal of Lifestyle               | 0.1657   |             | Categorical                |                           |
| Multi Silvopasture    | Goal of Income                  | 0.7567   |             | Categorical                |                           |
|                       | Goal of Conservation            | 0.0027** | r2 = 0.0440 | Categorical                | Positive                  |
|                       | Goal of Recreation              | 0.0279*  | r2 = 0.0272 | Categorical                | Positive                  |
|                       | Goal of Education               | <.0001** | r2 = 0.0924 | Categorical                | Positive                  |
|                       | Goal of Agritourism             | 0.0001** | r2 = 0.0672 | Categorical                | Positive                  |
|                       | Goal of Lifestyle               | 0.1179   |             | Categorical                |                           |
| Forest Farm           | Goal of Income                  | 0.3346   |             | Categorical                |                           |
|                       | Goal of Conservation            | 0.0024** | r2 = 0.0450 | Categorical                | Positive                  |
|                       | Goal of Recreation              | 0.0009** | r2 = 0.0531 | Categorical                | Positive                  |
|                       | Goal of Education               | 0.003**  | r2 = 0.0438 | Categorical                | Positive                  |
|                       | Goal of Agritourism             | <.0001** | r2 = 0.0939 | Categorical                | Positive                  |
|                       | Goal of Lifestyle               | 0.0046** | r2 = 0.0402 | Categorical                | Positive                  |

Results in table are from one-way ANOVA in SAS proc General Linear Model (GLM). Source: Landowner Survey, 2021

<sup>1</sup>Independent variable is each of the goals analyzed separately for their influence on the dependent variable, “Would Plant Design,” “Would Plant with Funding,” and “Would Plant with Technical Assistance.”

<sup>2</sup>Classification of independent factor used to predict willingness to plant agroforestry designs, either categorical or continuous

<sup>3</sup>Relationship between independent variable and its influence on dependent variable - willingness to plant agroforestry design for significant variables

\* Indicates significant p-value

\*\* Indicates highly significant p-value

Model fit (r<sup>2</sup>) is shown for only significant variables

Table S4. Landowner farm goals and their willingness to plant agroforestry with technical assistance

| Design                | Independent Factor <sup>1</sup> | P-value  | Model Fit               | Variable Type <sup>2</sup> | Relationship <sup>3</sup> |
|-----------------------|---------------------------------|----------|-------------------------|----------------------------|---------------------------|
| Multi Windbreak       | Goal of Income                  | 0.0555   |                         | Categorical                |                           |
|                       | Goal of Conservation            | 0.0086** | r <sup>2</sup> = 0.0352 | Categorical                | Positive                  |
|                       | Goal of Recreation              | 0.0206*  | r <sup>2</sup> = 0.0292 | Categorical                | Positive                  |
|                       | Goal of Education               | <.0001** | r <sup>2</sup> = 0.0898 | Categorical                | Positive                  |
|                       | Goal of Agritourism             | <.0001** | r <sup>2</sup> = 0.0966 | Categorical                | Positive                  |
|                       | Goal of Lifestyle               | 0.2434   |                         | Categorical                |                           |
| Multi Riparian Buffer | Goal of Income                  | 0.6617   |                         | Categorical                |                           |
|                       | Goal of Conservation            | 0.0718   |                         | Categorical                |                           |
|                       | Goal of Recreation              | 0.0388*  | r <sup>2</sup> = 0.0247 | Categorical                | Positive                  |
|                       | Goal of Education               | 0.0028** | r <sup>2</sup> = 0.0443 | Categorical                | Positive                  |
|                       | Goal of Agritourism             | 0.0002** | r <sup>2</sup> = 0.0644 | Categorical                | Positive                  |
|                       | Goal of Lifestyle               | 0.072    |                         | Categorical                |                           |
| Multi Silvopasture    | Goal of Income                  | 0.5104   |                         | Categorical                |                           |
|                       | Goal of Conservation            | 0.0105*  | r <sup>2</sup> = 0.0342 | Categorical                | Positive                  |
|                       | Goal of Recreation              | 0.0491*  | r <sup>2</sup> = 0.0230 | Categorical                | Positive                  |
|                       | Goal of Education               | 0.0002** | r <sup>2</sup> = 0.0635 | Categorical                | Positive                  |
|                       | Goal of Agritourism             | <.0001** | r <sup>2</sup> = 0.0733 | Categorical                | Positive                  |
|                       | Goal of Lifestyle               | 0.0533   |                         | Categorical                |                           |
| Forest Farm           | Goal of Income                  | 0.4385   |                         | Categorical                |                           |
|                       | Goal of Conservation            | 0.001**  | r <sup>2</sup> = 0.0499 | Categorical                | Positive                  |
|                       | Goal of Recreation              | 0.0022** | r <sup>2</sup> = 0.0464 | Categorical                | Positive                  |
|                       | Goal of Education               | 0.0067** | r <sup>2</sup> = 0.0380 | Categorical                | Positive                  |
|                       | Goal of Agritourism             | <.0001** | r <sup>2</sup> = 0.0966 | Categorical                | Positive                  |
|                       | Goal of Lifestyle               | 0.0004** | r <sup>2</sup> = 0.0574 | Categorical                | Positive                  |

Results in table are from one-way ANOVA in SAS proc General Linear Model (GLM). Source: Landowner Survey, 2021

<sup>1</sup>Independent variable is each of the goals analyzed separately for their influence on the dependent variable, “Would Plant Design,” “Would Plant with Funding,” and “Would Plant with Technical Assistance.” Goal of income means landowner focuses on using land to generate a source of income.

<sup>2</sup>Classification of independent factor used to predict willingness to plant agroforestry designs, either categorical or continuous

<sup>3</sup>Relationship between independent variable and its influence on dependent variable - willingness to plant agroforestry design for significant variables

\* Indicates significant p-value

\*\* Indicates highly significant p-value

Model fit (r<sup>2</sup>) is shown for only significant variables

# Preferences for Agricultural Land Use, Conservation Practices, and Tree Planting

You are invited to participate in a survey conducted by the University of Missouri, Center for Agroforestry. The questions focus on your perspectives of agricultural land use, tree planting, and conservation practices and should be completed by the person who has the main responsibility for making farm management decisions. Your responses will help researchers, policymakers, and other landowners understand the opportunities and challenges of developing conservation tree plantings on agricultural land for your region. Your participation is completely voluntary, and your responses will remain anonymous. The survey takes around 20 - 30 minutes to complete. For additional information, please contact Raelin Kronenberg, Graduate Student Researcher (rlk5hp@mail.missouri.edu) or Sarah Lovell, Professor and Director of the Center for Agroforestry (slovell@missouri.edu). Questions about your rights as a research participant can be directed to the University of Missouri Institutional Review Board (IRB) by calling 573.882.3181 or email [irb@missouri.edu](mailto:irb@missouri.edu). To take the survey online go to: <https://tinyurl.com/qualtricsagsurvey>

We appreciate your participation!

## LUCKY DRAW FOR \$25 GIFT CARD

Be one of the first 100 surveys completed and returned by August 31st, 2021 for a chance to win one of twenty \$25 gift cards. Please provide your contact information at the end of the survey. Your responses will remain anonymous unless you chose to leave your contact information for the gift card drawing.

All personal information collected by this survey will be kept confidential.

Please confirm you are at least 18 years old: ☐ Yes – continue with survey ☐ No – thank you for your consideration!

Are you the primary person who makes the land use decisions for your property?

☐ Yes – continue survey ☐ No – survey complete, please return packet

By continuing with the survey, you indicate your consent to participate in this research

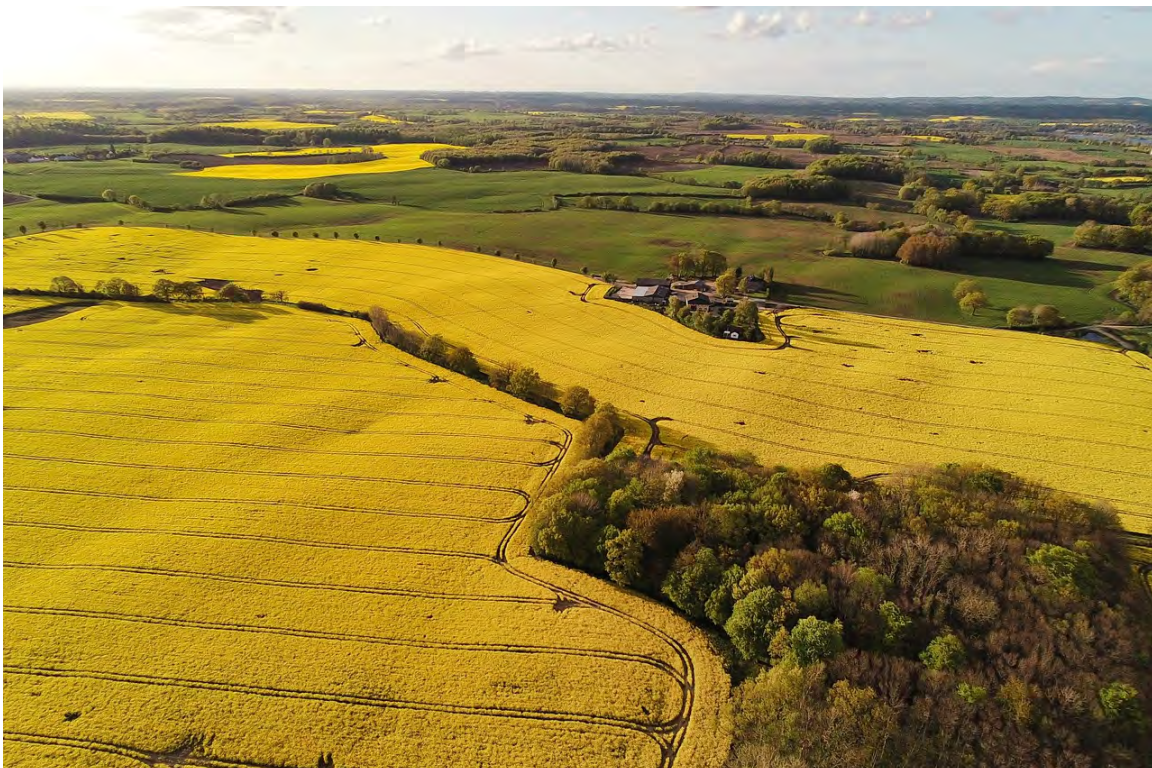

**Part 1: Farm Information** Please answer the following questions based on your current farm.

1.1 Which Missouri county is your primary farm located in? \_\_\_\_\_

1.2 Do you live on the farm? ☐ Yes ☐ No

➔ If no, which county is your primary home residence in? \_\_\_\_\_

1.3 What year did you begin **THIS** farm operation? \_\_\_\_\_

1.4 What year did you begin farming? \_\_\_\_\_

1.5 During 2020, how many total acres on this operation

Mark "x"  
if none

| Number<br>of Acres |
|--------------------|
|                    |
|                    |
|                    |

1.5a Were owned .....

1.5b Where rented or leased from others .....

1.5c Were rented or leased to others .....

1.6 Do you have land you consider marginal, less productive than the typical agricultural land in your area?

☐ Yes

☐ No

☐ I'm not sure

➔ If yes, how many acres? \_\_\_\_\_

➔ Are these areas less productive because they are (*check all that apply*)

☐ Along a tree line

☐ Poorly drained or wet areas

☐ Shaded areas

☐ Along a river or creek

☐ Steeply sloped areas

☐ Have unproductive soil

☐ Other: \_\_\_\_\_

1.7 Indicate the importance of the following statements for your farm.

|                                                                                                           | Not<br>Important         | Moderately<br>Important  | Very<br>Important        |
|-----------------------------------------------------------------------------------------------------------|--------------------------|--------------------------|--------------------------|
| To provide income from the production of crops, livestock, and/or timber.                                 | <input type="checkbox"/> | <input type="checkbox"/> | <input type="checkbox"/> |
| To conserve natural resources by providing wildlife habitat, protecting soil, and improving water quality | <input type="checkbox"/> | <input type="checkbox"/> | <input type="checkbox"/> |
| To offer recreational opportunities such as hunting, hiking, and photography.                             | <input type="checkbox"/> | <input type="checkbox"/> | <input type="checkbox"/> |
| To provide educational experiences by trying different planting systems and management plans.             | <input type="checkbox"/> | <input type="checkbox"/> | <input type="checkbox"/> |
| To engage people in the rural lifestyle experience through agritourism opportunities.                     | <input type="checkbox"/> | <input type="checkbox"/> | <input type="checkbox"/> |
| To provide a rural lifestyle for myself and/or my family.                                                 | <input type="checkbox"/> | <input type="checkbox"/> | <input type="checkbox"/> |
| Other:                                                                                                    | <input type="checkbox"/> | <input type="checkbox"/> | <input type="checkbox"/> |



**Part 2: Agricultural Landscape Preferences** Below are several planting plans and images of rural landscapes. These images serve as examples of different land management practices. Indicate the desirability of the scenes in these images considering that plant varieties and spacing can be changed to fit land management goals.

2.1 Field Edge

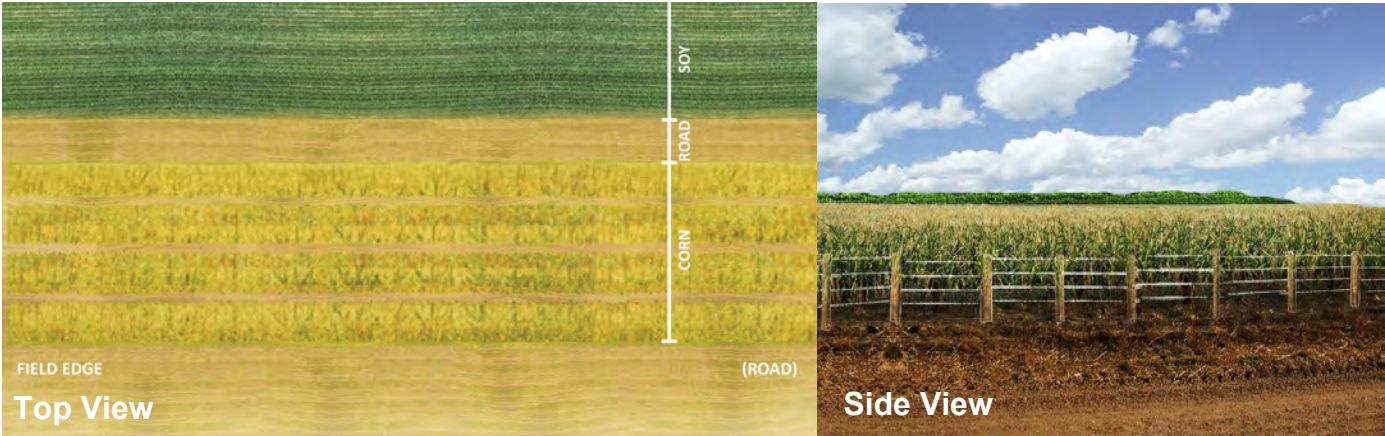

How desirable is the above image of an open field edge?

| Very Undesirable         | Undesirable              | Neutral                  | Desirable                | Very Desirable           |
|--------------------------|--------------------------|--------------------------|--------------------------|--------------------------|
| <input type="checkbox"/> |

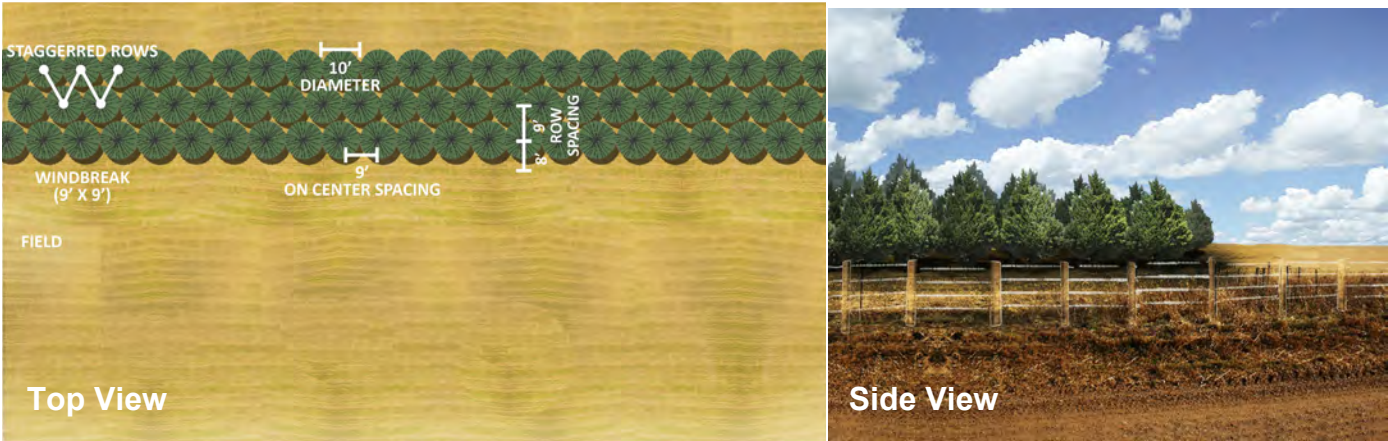

How desirable is the above image of a windbreak with conifer trees for a field edge?

| Very Undesirable         | Undesirable              | Neutral                  | Desirable                | Very Desirable           |
|--------------------------|--------------------------|--------------------------|--------------------------|--------------------------|
| <input type="checkbox"/> |

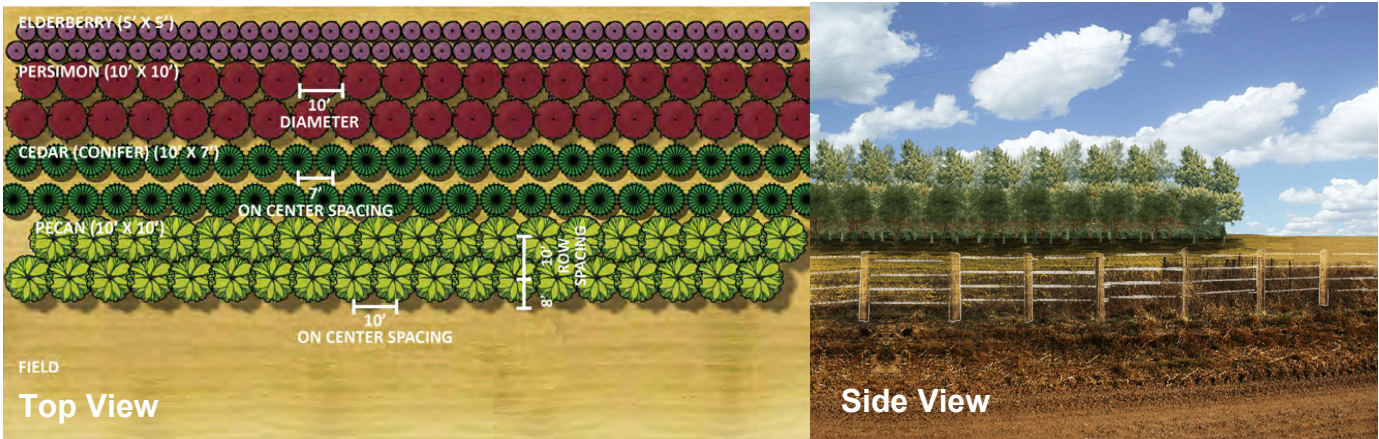

How desirable is the above image of a windbreak with edible fruit and nut species for a field edge?

| Very Undesirable         | Undesirable              | Neutral                  | Desirable                | Very Desirable           |
|--------------------------|--------------------------|--------------------------|--------------------------|--------------------------|
| <input type="checkbox"/> |



**2.2 Windbreak with Edible Species** Below are more detailed questions about the same design you rated on the previous page.

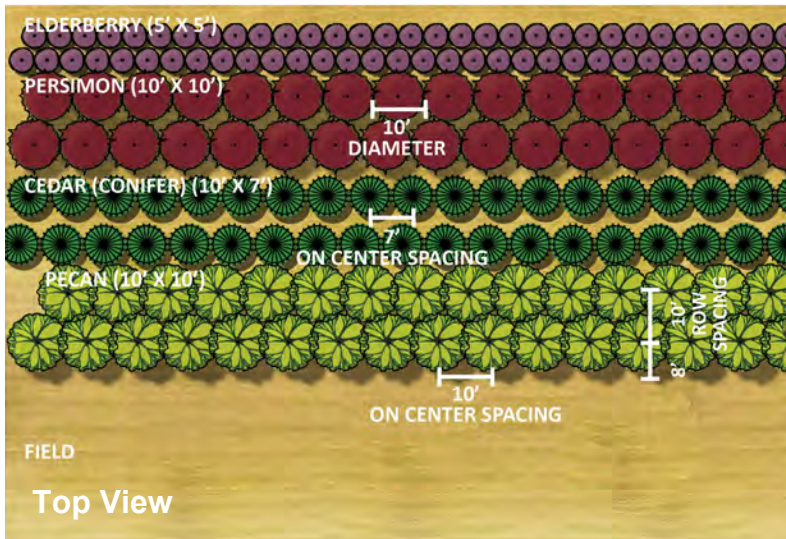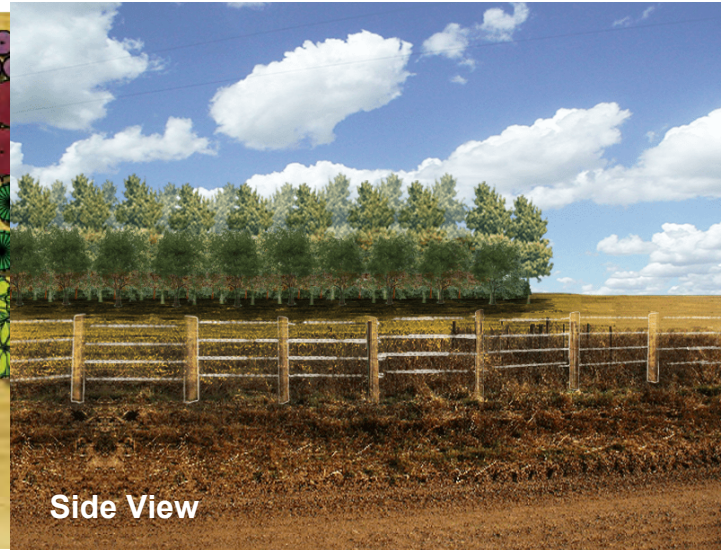

Indicate to what level you agree or disagree with the following statements regarding the above planting plan for a windbreak with edible fruit and nut species. *Since different spacing and plant varieties may be better suited for your land management goals, rate the images based on the design as a whole knowing it could be adjusted to your preferences.*

|                                                                                 | Strongly Disagree        | Disagree                 | Unsure                   | Agree                    | Strongly Agree           |
|---------------------------------------------------------------------------------|--------------------------|--------------------------|--------------------------|--------------------------|--------------------------|
| It would be a productive use of land.                                           | <input type="checkbox"/> |
| It would be difficult to manage.                                                | <input type="checkbox"/> |
| It would provide conservation of natural resources (soil, water, etc.)          | <input type="checkbox"/> |
| It would provide recreational opportunities (hunting, hiking, photography etc.) | <input type="checkbox"/> |
| It would provide products for my own use (nuts, berries, wood etc.)             | <input type="checkbox"/> |
| It would increase wildlife habitat and biodiversity.                            | <input type="checkbox"/> |
| It would attract unwanted wildlife.                                             | <input type="checkbox"/> |
| It would improve soil health and provide erosion control.                       | <input type="checkbox"/> |
| It would mitigate chemical drift (pesticides, herbicides, fertilizer).          | <input type="checkbox"/> |
| It would be financially profitable.                                             | <input type="checkbox"/> |
| It would be expensive to plant and care for.                                    | <input type="checkbox"/> |
| Other benefits or concerns                                                      | <input type="checkbox"/> |
| <b>Please specify:</b>                                                          |                          |                          |                          |                          |                          |

*In regards to the windbreak planted with edible fruit and nut species...*

|                                                               | Yes                      | No                       | Unsure                   |
|---------------------------------------------------------------|--------------------------|--------------------------|--------------------------|
| I am interested in planting this design on my farm.           | <input type="checkbox"/> | <input type="checkbox"/> | <input type="checkbox"/> |
| I would plant this design if I received conservation funding  | <input type="checkbox"/> | <input type="checkbox"/> | <input type="checkbox"/> |
| I would plant this design if I received technical assistance. | <input type="checkbox"/> | <input type="checkbox"/> | <input type="checkbox"/> |



**2.3 Pasture** Below are several planting plans and images of livestock pastures. Indicate the desirability of the scenes in these images considering that plant varieties and spacing can be changed to fit land management goals.

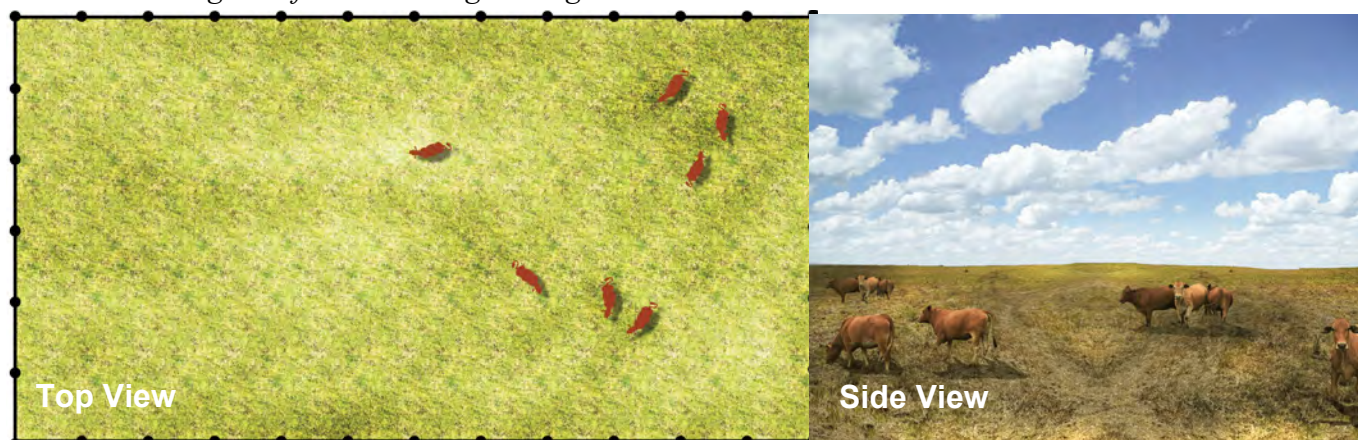

How desirable is the above image of an open pasture?

| Very Undesirable         | Undesirable              | Neutral                  | Desirable                | Very Desirable           |
|--------------------------|--------------------------|--------------------------|--------------------------|--------------------------|
| <input type="checkbox"/> |

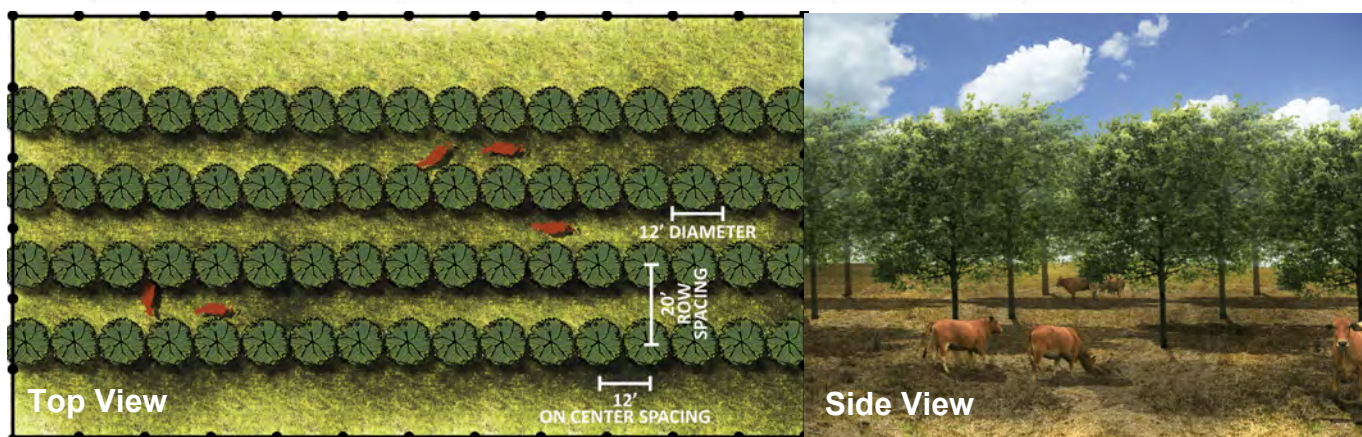

How desirable is the above image of a hardwood silvopasture?

| Very Undesirable         | Undesirable              | Neutral                  | Desirable                | Very Desirable           |
|--------------------------|--------------------------|--------------------------|--------------------------|--------------------------|
| <input type="checkbox"/> |

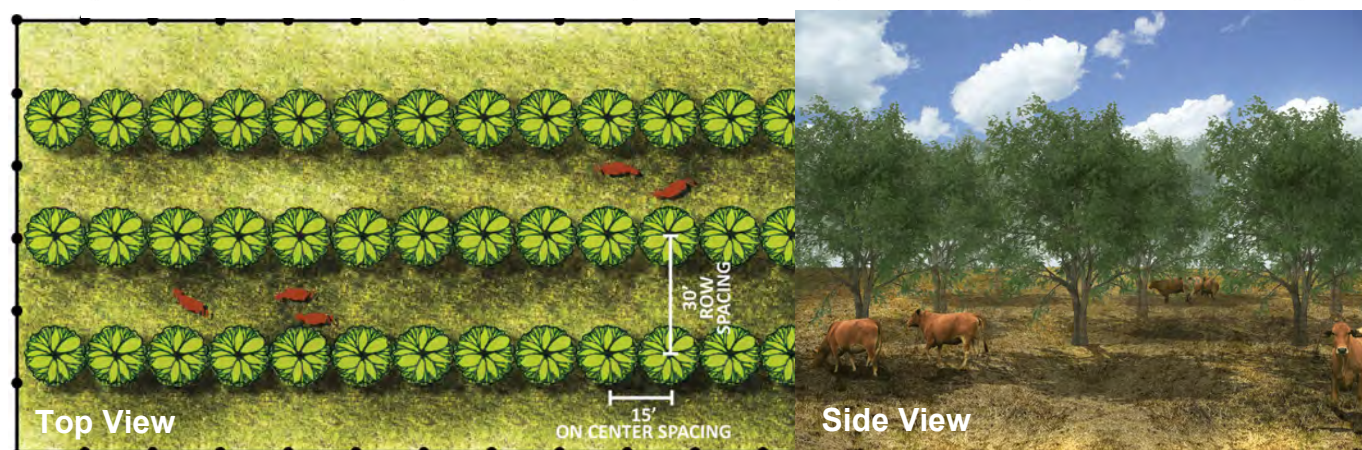

How desirable is the above image of a nut tree silvopasture?

| Very Undesirable         | Undesirable              | Neutral                  | Desirable                | Very Desirable           |
|--------------------------|--------------------------|--------------------------|--------------------------|--------------------------|
| <input type="checkbox"/> |



**2.4 Pasture with Edible Tree Species** Below are more detailed questions about the same design you rated on the previous page.

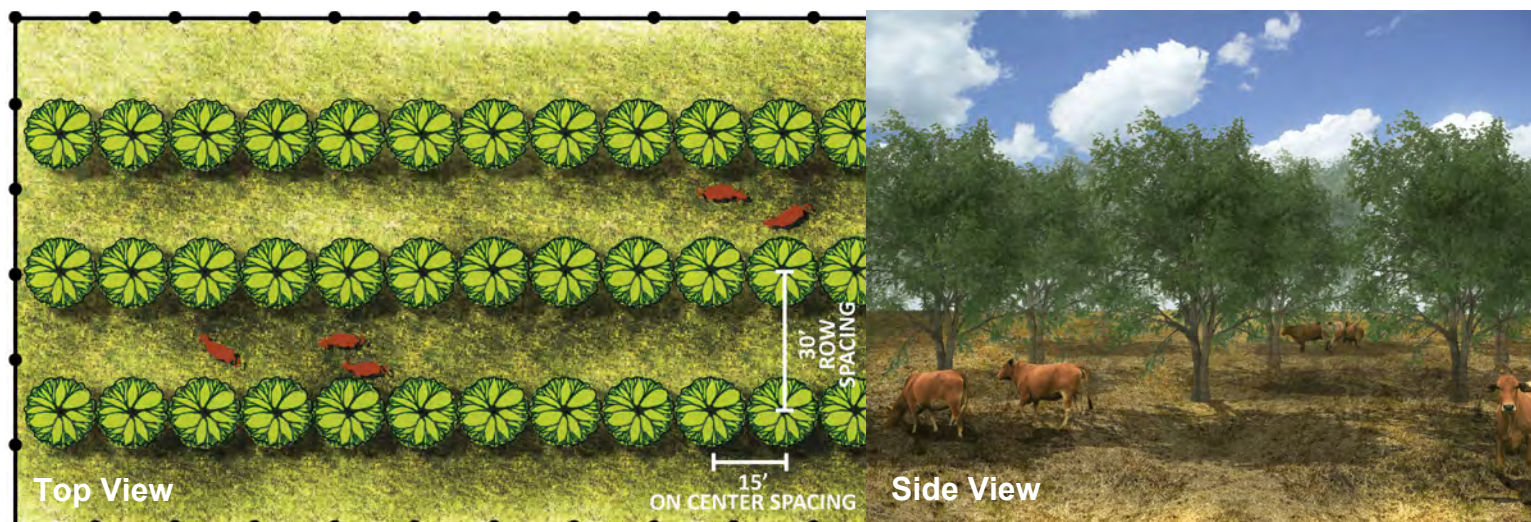

Indicate to what level you agree or disagree with the following statements regarding the above planting plan of a pecan silvopasture. *Reminder - this design could be adjusted to your preferences.*

|                                                                                 | Strongly Disagree        | Disagree                 | Unsure                   | Agree                    | Strongly Agree           |
|---------------------------------------------------------------------------------|--------------------------|--------------------------|--------------------------|--------------------------|--------------------------|
| It would be a productive use of land.                                           | <input type="checkbox"/> |
| It would be difficult to manage.                                                | <input type="checkbox"/> |
| It would provide conservation of natural resources (soil, water, etc.)          | <input type="checkbox"/> |
| It would provide recreational opportunities (hunting, hiking, photography etc.) | <input type="checkbox"/> |
| It would provide products for my own use (nuts, berries, wood etc.)             | <input type="checkbox"/> |
| It would increase wildlife habitat and biodiversity.                            | <input type="checkbox"/> |
| It would attract unwanted wildlife.                                             | <input type="checkbox"/> |
| It would improve soil health and provide erosion control.                       | <input type="checkbox"/> |
| It would mitigate chemical drift (pesticides, herbicides, fertilizer).          | <input type="checkbox"/> |
| It would be financially profitable.                                             | <input type="checkbox"/> |
| It would be expensive to plant and care for.                                    | <input type="checkbox"/> |
| Other benefits or concerns<br><b>Please specify:</b>                            | <input type="checkbox"/> |

*In regards to the pasture planted with nut producing trees...*

|                                                               | Yes                      | No                       | Unsure                   |
|---------------------------------------------------------------|--------------------------|--------------------------|--------------------------|
| I am interested in planting this design on my farm.           | <input type="checkbox"/> | <input type="checkbox"/> | <input type="checkbox"/> |
| I would plant this design if I received conservation funding  | <input type="checkbox"/> | <input type="checkbox"/> | <input type="checkbox"/> |
| I would plant this design if I received technical assistance. | <input type="checkbox"/> | <input type="checkbox"/> | <input type="checkbox"/> |



**2.5 Riparian Areas** Below are several planting plans and images of stream areas. Indicate the desirability of the scenes in these images considering that plant varieties and spacing can be changed to fit land management goals.

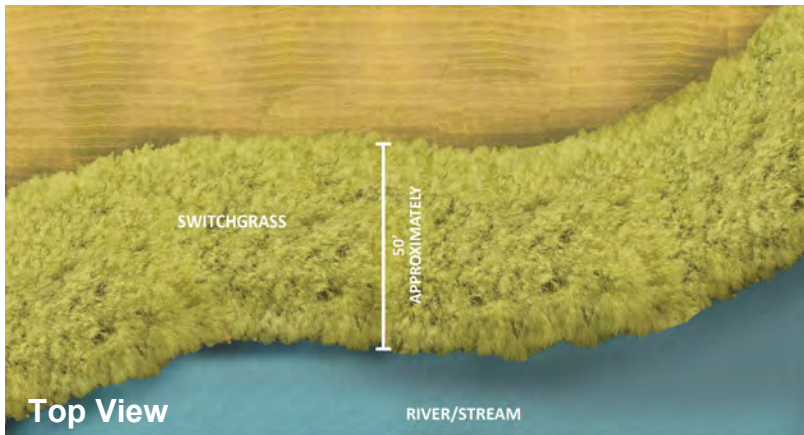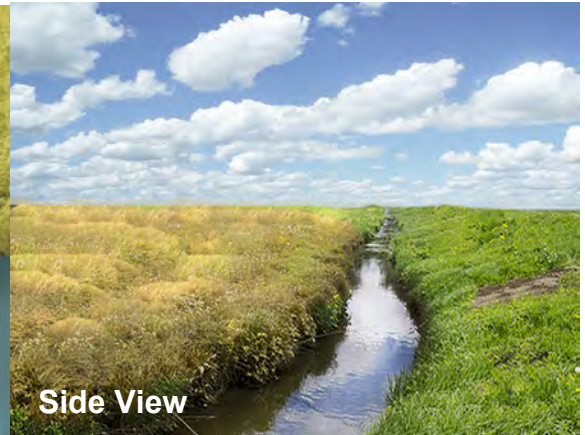

How desirable is the above image of a grass filter strip?

| Very Undesirable         | Undesirable              | Neutral                  | Desirable                | Very Desirable           |
|--------------------------|--------------------------|--------------------------|--------------------------|--------------------------|
| <input type="checkbox"/> |

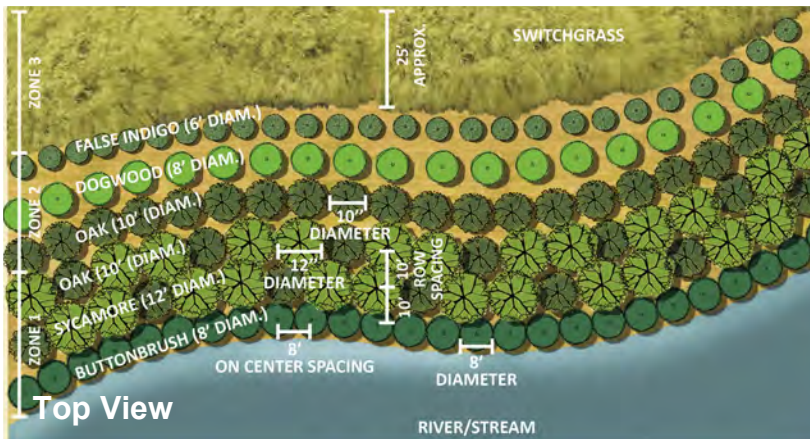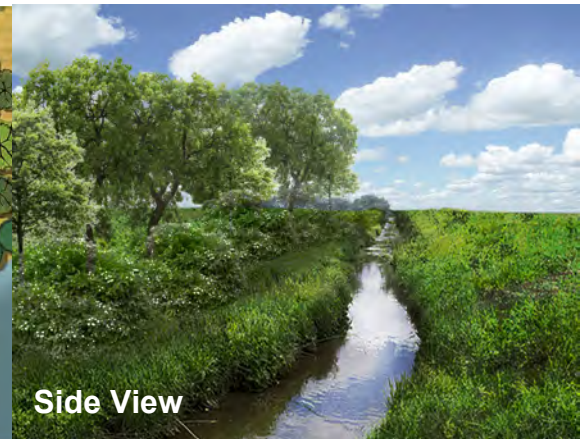

How desirable is the above image of a riparian forest buffer?

| Very Undesirable         | Undesirable              | Neutral                  | Desirable                | Very Desirable           |
|--------------------------|--------------------------|--------------------------|--------------------------|--------------------------|
| <input type="checkbox"/> |

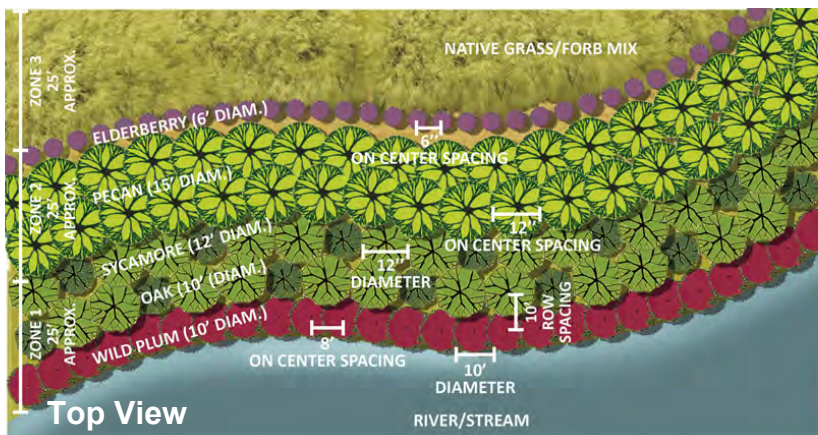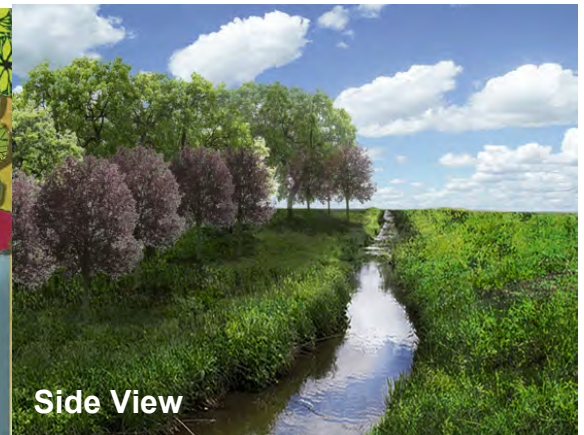

How desirable is the above image of a riparian forest buffer with edible fruit and nut species?

| Very Undesirable         | Undesirable              | Neutral                  | Desirable                | Very Desirable           |
|--------------------------|--------------------------|--------------------------|--------------------------|--------------------------|
| <input type="checkbox"/> |



**2.6 Riparian Buffer with Edible Species** Below are more detailed questions about the same design you rated on the previous page.

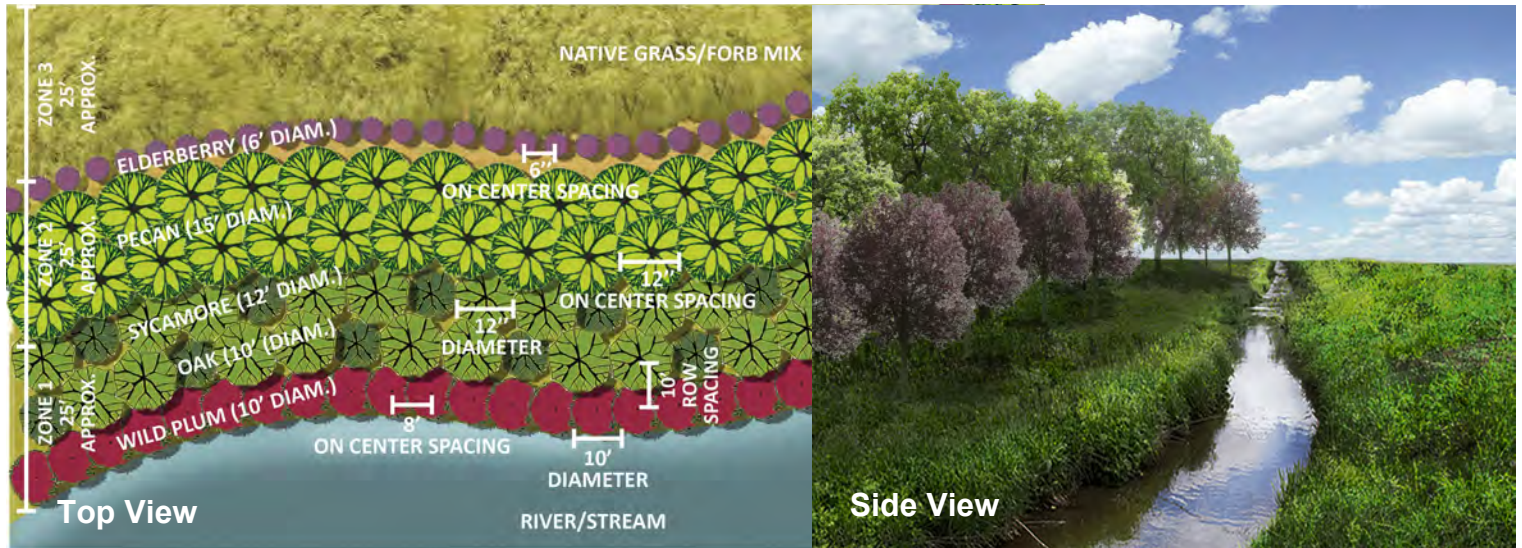

Indicate to what level you agree or disagree with the following statements regarding the above planting plan of a riparian forest buffer with edible fruit and nut species. *Reminder - this design could be adjusted to your preferences.*

|                                                                                 | Strongly Disagree        | Disagree                 | Unsure                   | Agree                    | Strongly Agree           |
|---------------------------------------------------------------------------------|--------------------------|--------------------------|--------------------------|--------------------------|--------------------------|
| It would be a productive use of land.                                           | <input type="checkbox"/> |
| It would be difficult to manage.                                                | <input type="checkbox"/> |
| It would provide conservation of natural resources (soil, water, etc.)          | <input type="checkbox"/> |
| It would provide recreational opportunities (hunting, hiking, photography etc.) | <input type="checkbox"/> |
| It would provide products for my own use (nuts, berries, wood etc.)             | <input type="checkbox"/> |
| It would increase wildlife habitat and biodiversity.                            | <input type="checkbox"/> |
| It would attract unwanted wildlife.                                             | <input type="checkbox"/> |
| It would improve soil health and provide erosion control.                       | <input type="checkbox"/> |
| It would mitigate chemical drift (pesticides, herbicides, fertilizer).          | <input type="checkbox"/> |
| It would be financially profitable.                                             | <input type="checkbox"/> |
| It would be expensive to plant and care for.                                    | <input type="checkbox"/> |
| Other benefits or concerns<br><b>Please specify:</b>                            | <input type="checkbox"/> |

*In regards to the riparian forest buffer planted with edible fruit and nut species...*

|                                                               | Yes                      | No                       | Unsure                   |
|---------------------------------------------------------------|--------------------------|--------------------------|--------------------------|
| I am interested in planting this design on my farm.           | <input type="checkbox"/> | <input type="checkbox"/> | <input type="checkbox"/> |
| I would plant this design if I received conservation funding  | <input type="checkbox"/> | <input type="checkbox"/> | <input type="checkbox"/> |
| I would plant this design if I received technical assistance. | <input type="checkbox"/> | <input type="checkbox"/> | <input type="checkbox"/> |



**2.7 Forest** Below are several planting plans and images of forests. Indicate the desirability of the scenes in these images considering that plant varieties and spacing can be changed to fit land management goals.

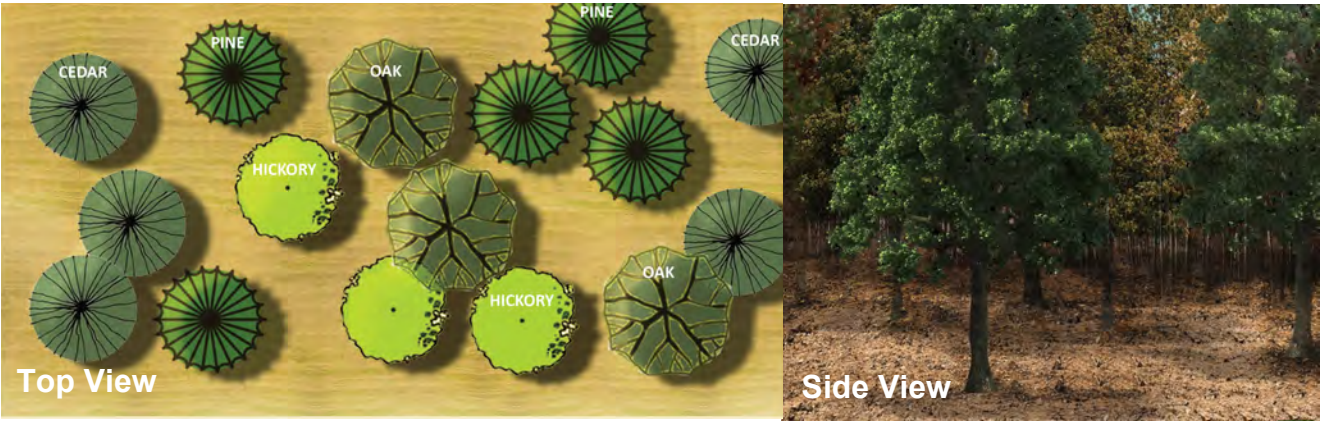

How desirable is the above image of an unmanaged forest?

| Very Undesirable         | Undesirable              | Neutral                  | Desirable                | Very Desirable           |
|--------------------------|--------------------------|--------------------------|--------------------------|--------------------------|
| <input type="checkbox"/> |

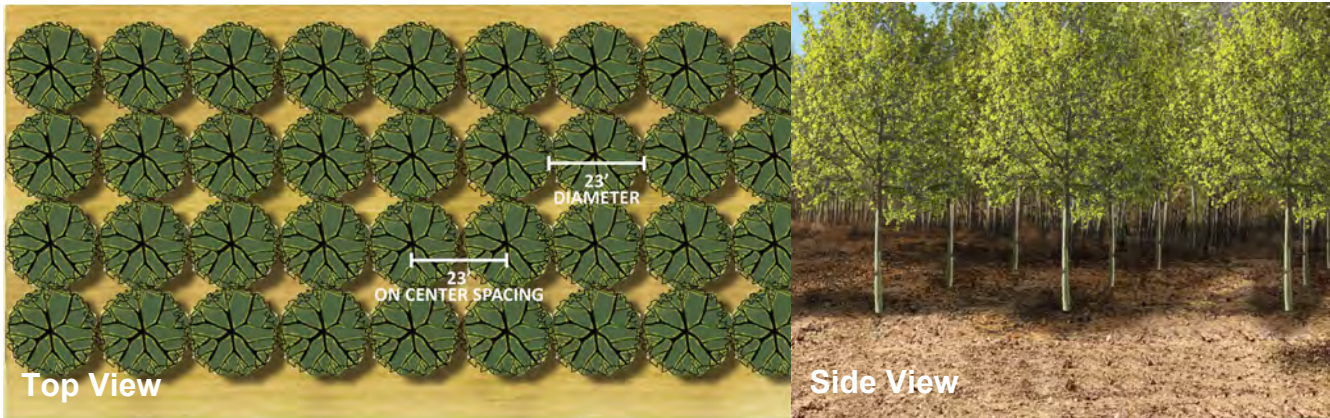

How desirable is the above image of a hardwood timber stand?

| Very Undesirable         | Undesirable              | Neutral                  | Desirable                | Very Desirable           |
|--------------------------|--------------------------|--------------------------|--------------------------|--------------------------|
| <input type="checkbox"/> |

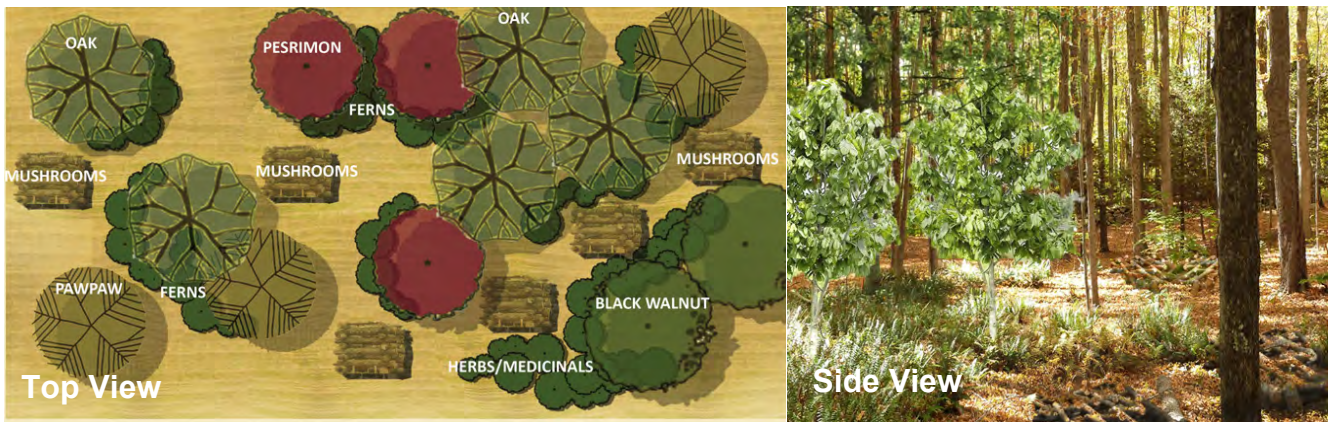

How desirable is the above image of a forest farm?

| Very Undesirable         | Undesirable              | Neutral                  | Desirable                | Very Desirable           |
|--------------------------|--------------------------|--------------------------|--------------------------|--------------------------|
| <input type="checkbox"/> |



## 2.8 Forest Farming *Below are more detailed questions about the same design you rated on the previous page.*

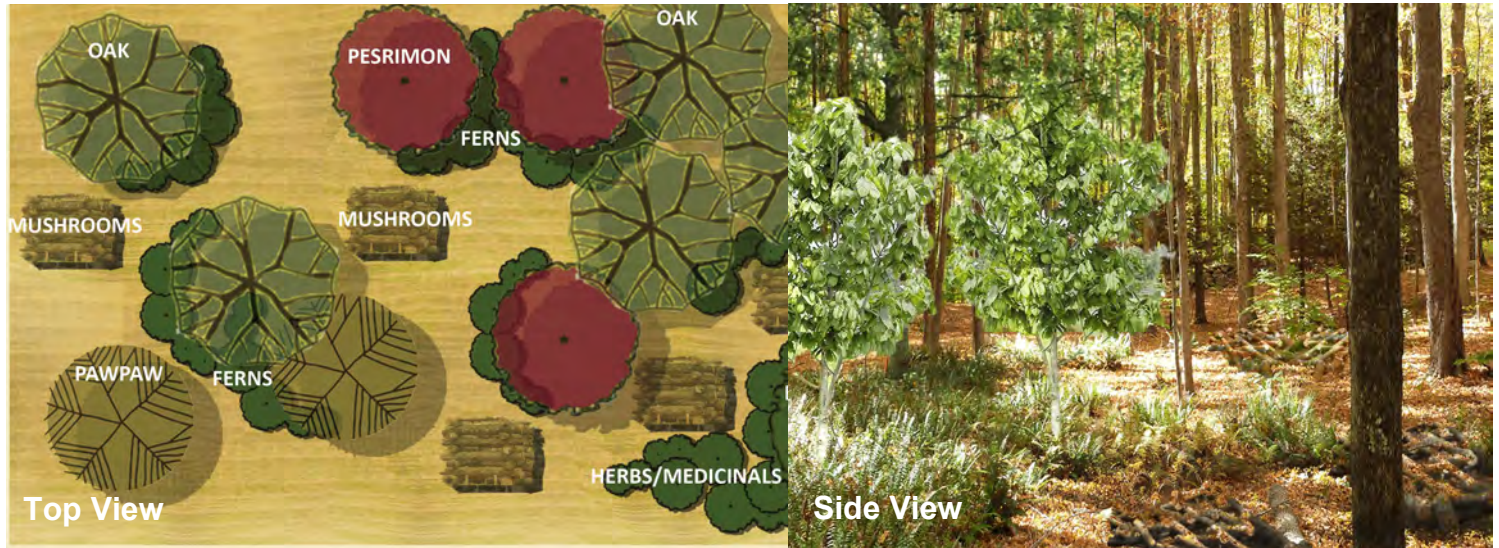

Indicate to what level you agree or disagree with the following statements regarding the above planting plan of a forest farm. *Reminder - this design could be adjusted to your preferences.*

|                                                                                 | Strongly Disagree        | Disagree                 | Unsure                   | Agree                    | Strongly Agree           |
|---------------------------------------------------------------------------------|--------------------------|--------------------------|--------------------------|--------------------------|--------------------------|
| It would be a productive use of land.                                           | <input type="checkbox"/> |
| It would be difficult to manage.                                                | <input type="checkbox"/> |
| It would provide conservation of natural resources (soil, water, etc.)          | <input type="checkbox"/> |
| It would provide recreational opportunities (hunting, hiking, photography etc.) | <input type="checkbox"/> |
| It would provide products for my own use (nuts, berries, wood etc.)             | <input type="checkbox"/> |
| It would increase wildlife habitat and biodiversity.                            | <input type="checkbox"/> |
| It would attract unwanted wildlife.                                             | <input type="checkbox"/> |
| It would improve soil health and provide erosion control.                       | <input type="checkbox"/> |
| It would mitigate chemical drift (pesticides, herbicides, fertilizer).          | <input type="checkbox"/> |
| It would be financially profitable.                                             | <input type="checkbox"/> |
| It would be expensive to plant and care for.                                    | <input type="checkbox"/> |
| Other benefits or concerns<br><b>Please specify:</b>                            | <input type="checkbox"/> |

*In regards to a forest farm planted with edible fruit and nut species....*

|                                                               | Yes                      | No                       | Unsure                   |
|---------------------------------------------------------------|--------------------------|--------------------------|--------------------------|
| I am interested in planting this design on my farm.           | <input type="checkbox"/> | <input type="checkbox"/> | <input type="checkbox"/> |
| I would plant this design if I received conservation funding  | <input type="checkbox"/> | <input type="checkbox"/> | <input type="checkbox"/> |
| I would plant this design if I received technical assistance. | <input type="checkbox"/> | <input type="checkbox"/> | <input type="checkbox"/> |



### Part 3: Land Characteristics and Management Practices on Your Farm

3.1 During 2020, what was the total number of acres under each land use  
(uses may overlap, acres do not have to add up to total owned)

- 3.1a Harvested cropland (Include annual row crops).....
- 3.1b Abandoned/failed cropland (Crops planted but not harvested)
- 3.1c Fallow cropland (Fields left unplanted).....
- 3.1d Idle cropland (Field planted with cover crops).....
- 3.1e Permanent pasture or rangeland .....
- 3.1f Wooded pasture (Land used as pasture with tree cover).....
- 3.1g Non-pastured woodland (Woodlots, maple trees/sugarbush)..
- 3.1h Orchard crop (Fruit, nut) .....
- 3.1i Enrolled in a conservation program (Such as CRP or EQIP) ...

Mark "x"  
if none

| Mark "x"<br>if none | Number<br>of Acres |
|---------------------|--------------------|
|                     |                    |
|                     |                    |
|                     |                    |
|                     |                    |
|                     |                    |
|                     |                    |
|                     |                    |
|                     |                    |
|                     |                    |

3.2 Did you use any of the following land management practices during the year 2020? (Check all that apply)

- ☐ Conventional tillage (Any tillage or seeding system that maintains less than 15% residue cover on the soil surface after planting).
- ☐ Conservation tillage (Any tillage or seeding system that maintains a minimum of 30% residue cover on the soil surface after planting to reduce soil erosion).
- ☐ Cover cropping (Grasses, legumes, and forbs planted for seasonal vegetative cover to reduce erosion, manage pests, and maintain soil fertility).
- ☐ Organic practices (A set of cultural, biological, and mechanical practices that support the cycling of on-farm resources, promote ecological balance, and conserve biodiversity).
- ☐ Timber/forest management (Planting trees, thinning, or harvesting to improve forest stands for timber, forest health, and/or wildlife habitat).
- ☐ Under land-use restricted easement [Including the Conservation Reserve Program (CRP), Wetlands Reserve Program (WRP), Farmable Wetlands Program (FWP), or Conservation Reserve Enhancement Program (CREP)].
- ☐ Agroforestry (The intentional integration and management of trees in an agricultural system with crops and/or livestock).

➔ You checked agroforestry. Which of the following practices did you use in 2020? (*Select all used*)

- ☐ Silvopasture – grazing livestock among trees in a highly managed system to maximize production of forage, tree products such as timber or nuts, and livestock
- ☐ Alley Cropping – growing a crop between rows of managed trees
- ☐ Forest Farming – managing a forest stand for products such as mushrooms, herbs, and honey
- ☐ Riparian Forest Buffers – plantings of trees and/or shrubs within the riparian zone of a stream that are managed to reduce bank erosion and improve water quality
- ☐ Windbreaks – rows of tree plantings managed to reduce soil erosion from wind, protect livestock, and improve building energy efficiency
- ☐ Other Woody Crop Establishment - planting of other food producing tree or shrub crops

3.3 What conservation programs, if any, were you enrolled in during the year 2020?

3.3a Conservation reserve program (CRP)

3.3b Environmental Quality Incentives Program (EQIP)

3.3c Conservation Stewardship Program (CSP)

3.3d Other (*Please list*) \_\_\_\_\_

Mark "x"  
if none

|                          | Number of Acres |
|--------------------------|-----------------|
| <input type="checkbox"/> |                 |

3.4 Why did/didn't you choose to enroll in a conservation program?

---



---

3.5 Are you interested in participating in a conservation program in the future?

☐ No

➔ If no, explain the reasons why you would not want to participate.

---



---



---

☐ Yes

➔ If yes, explain the reasons why you want to participate.

---



---



---

## Part 5: Demographic Information

5.1 What is your gender identity?

- ☐ Male
- ☐ Female
- ☐ Non-binary
- ☐ Prefer not to say

5.2 What is your age? \_\_\_\_\_ years

5.3 Racial identity: *Please select all that apply*

- ☐ White
- ☐ Black or African American
- ☐ Hispanic, Latino, or Spanish
- ☐ American Indian or Alaska Native
- ☐ Asian
- ☐ Native Hawaiian or Pacific Islander

5.4 What is the highest level of education you have received?

- ☐ No schooling
- ☐ Some high school
- ☐ High school graduate (or equivalent)
- ☐ Trade or vocational degree
- ☐ Some college ( 1-4 years, associate degree)
- ☐ Bachelor (BA, BS, AB)
- ☐ Masters & higher (MS, MA, MD, JD, PhD, EdD)

5.5 Did farming make up the majority (50% or more) of your worktime in 2020?

- ☐ Yes
- ☐ No

➡ If no, please specify primary occupation \_\_\_\_\_

5.6 What is your approximate net income from your farming operation?

- ☐ Net loss/no income
- ☐ <\$1,000
- ☐ \$1,000 to \$19,999
- ☐ \$20,000 to \$39,999
- ☐ \$40,000 to \$69,999
- ☐ \$70,000 to \$99,000
- ☐ \$100,000 or more



Thank you for your response!

The information you shared will help guide future education and outreach programs with the goal to design planting systems and conservation practices that promote the sustainability and profitability of Missouri farms.

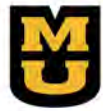

Center for Agroforestry  
University of Missouri

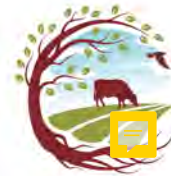

If you would like to participate in the drawing for the gift cards and/or receive more information about this research and related projects, please indicate so below. Your contact information will not be distributed to third parties or included in additional research without your consent.

**Contact Information (optional, include to join drawing for gift card and/or receive more info)**

Name: \_\_\_\_\_

Address: \_\_\_\_\_

Email: \_\_\_\_\_

Phone: \_\_\_\_\_

☐ Check box if you are interested in working further with us on multifunctional perennial cropping systems in Missouri.

4.3 Please share any additional comments you have concerning this survey or its contents.

---

---

---
